# Supplementary material for: Nuclear Morphology Optimized Deep Hybrid Learning (NUMODRIL) For Accurate Diagnosis and Prognosis of Ovarian Cancer
Source: Research Square preprint supplement (doi:10.21203/rs.3.rs-148149/v1), 2021-01-20
Supplement: Supplementary file 1 [file ecdc75f3ad8e5695477dac55.docx]

**Nuclear Morphology Optimized Deep Hybrid Learning (NUMODRIL) for accurate diagnosis and prognosis of Ovarian Cancer**

**Duhita Sengupta1#, SkNishan Ali2#, Aditya Bhattacharya2#, Joy Mustafi2#, Asima Mukhopadhyay3,4¶ & Kaushik Sengupta1***

1. **Biophysics and Structural Genomics Division, Saha Institute of Nuclear Physics, Kolkata, India ; Homi Bhaba National Institute, Mumbai, India**
2. **Artificial Intelligence and Machine Learning Division, MUST Research Trust, Flat 301, Block 4, Hyderabad 500046, Telangana, India**
3. **Chittaranjan National Cancer Institute, Kolkata, West Bengal 700156, India**
4. **Northern Gynaecological Oncology Centre, Queen Elizabeth Hospital, Gateshead, United Kingdom**

# Authors contributed equally

**¶Formerly at Tata Medical Center, Kolkata, West Bengal 700156, India**

***To whom correspondence should be addressed:** [**kaushik.sengupta@saha.ac.in**](mailto:kaushik.sengupta@saha.ac.in)

**Supplementary Figure:**


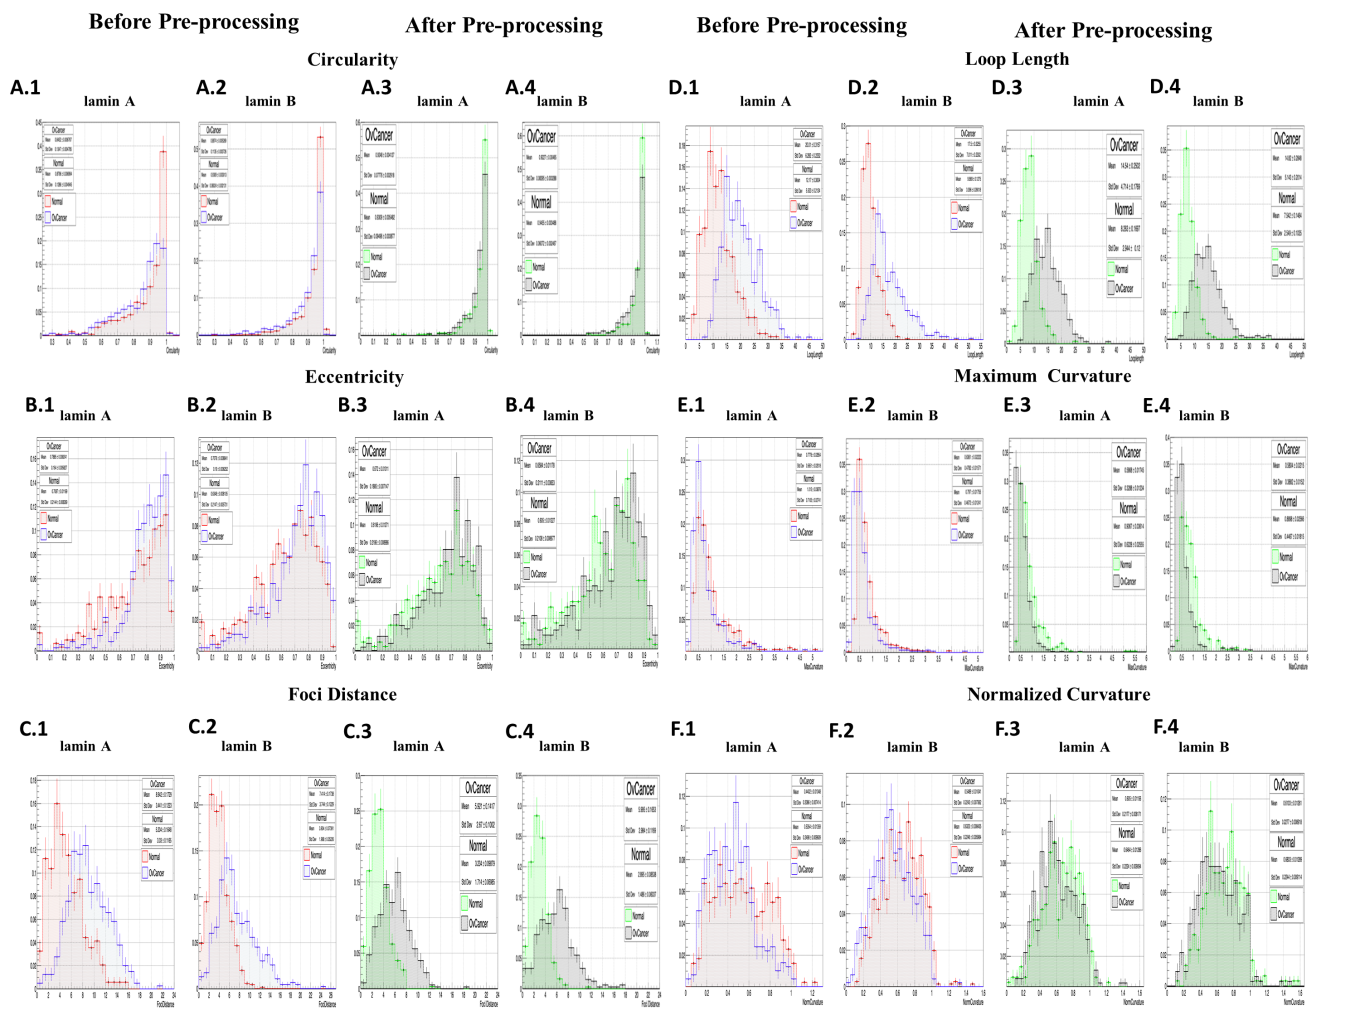


**Figure 1: Histograms showing distributions of the normal and Ovarian Cancer nuclei based on different morphometric parameters obtained from lamin A and B stained tissue sample images before and after pre-processing.** X axis denotes the normalised number of nuclei with respect to the total number of nuclei calculated. Y axis denotes the measure of the parameter.

**A. 1**.Comparative distribution of the number of normal (Mean±Std error of mean:0.8796± 0.005994) (Std Dev:0.1285±0.00495) and ovarian cancer (Mean±Std error of mean:0.8452± 0.006767) (Std Dev:0.1347±0.004785) nuclei based on Circularity values acquired from lamin A stained tissue images before pre-processing.

**A. 2.** Comparative distribution of the number of normal (Mean±Std error of mean:0.9309± 0.003013) (Std Dev:0.8024±0.002131) and ovarian cancer (Mean±Std error of mean:0.8974± 0.005269) (Std Dev:0.1135±0.003726) nuclei based on Circularity values acquired from lamin B stained tissue images before pre-processing.

**A. 3.**Comparative distribution of the number of normal (Mean±Std error of mean:0.9309± 0.005482) (Std Dev:0.09496±0.003877) and ovarian cancer (Mean±Std error of mean:0.9248± 0.004127) (Std Dev:0.0776±0.002918) nuclei based on Circularity values acquired from lamin A stained tissue images after pre-processing.

**A. 4.** Comparative distribution of the number of normal (Mean±Std error of mean:0.9455± 0.002488) (Std Dev:0.06072±0.002467) and ovarian cancer (Mean±Std error of mean:0.9227± 0.004665) (Std Dev:0.08395±0.03328) nuclei based on Circularity values acquired from lamin B stained tissue images after pre-processing.

**B. 1**.Comparative distribution of the number of normal (Mean±Std error of mean:0.7067± 0.01169) (Std Dev:0.2144±0.008269)  and ovarian cancer (Mean±Std error of mean:0.7885± 0.008241) (Std Dev:0.164±0.005827) nuclei based on Eccentricity values acquired from lamin A stained tissue images before pre-processing.

**B. 2.** Comparative distribution of the number of normal (Mean±Std error of mean:0.6348± 0.008105) (Std Dev:0.2147±0.005731)and diseased (Mean±Std error of mean:0.7076± 0.008841) (Std Dev:0.19±0.006252)nuclei based on Eccentricity values acquired from lamin B stained tissue images before pre-processing.

**B. 3**.Comparative distribution of the number of normal (Mean±Std error of mean:0.6196± 0.01271) (Std Dev:0.2186±0.00896)  and ovarian cancer (Mean±Std error of mean:0.672±0.01011) (Std Dev:0.1895±0.0071471) nuclei based on Eccentricity values acquired from lamin A stained tissue images after pre-processing.

**B. 4**.Comparative distribution of the number of normal (Mean±Std error of mean:0.605± 0.01227) (Std Dev:0.2108±0.00867)  and ovarian cancer (Mean±Std error of mean:0.6584±0.01178) (Std Dev:0.2111±0.00833) nuclei based on Eccentricity values acquired from lamin B stained tissue images after pre-processing.

**C. 1**.Comparative distribution of the number of normal (Mean±Std error of mean:5.204± 0.1648) (Std Dev:3.03±0.1165)  and ovarian cancer (Mean±Std error of mean:8.942± 0.1729) (Std Dev:3.441±0.1223) nuclei based on Foci Distance values acquired from lamin A stained tissue images before pre-processing.

**C. 2.** Comparative distribution of the number of normal (Mean±Std error of mean:3.934± 0.07391) (Std Dev:1.968±0.05226) and diseased (Mean±Std error of mean:7.414± 0.1738) (Std Dev:3.744±0.1229)nuclei based on Foci Distance values acquired from lamin B stained tissue images before pre-processing.

**C. 3**.Comparative distribution of the number of normal (Mean±Std error of mean:3.234± 0.09879) (Std Dev:1.714±0.06985)  and ovarian cancer (Mean±Std error of mean:5.921±0.1417) (Std Dev:2.67±0.1002) nuclei based on Foci Distance values acquired from lamin A stained tissue images after pre-processing.

**C. 4**.Comparative distribution of the number of normal (Mean±Std error of mean:2.895± 0.8538) (Std Dev:1.486±0.06037)  and ovarian cancer (Mean±Std error of mean:5.995±0.1653) (Std Dev:2.984±0.1169) nuclei based on Foci Distance values acquired from lamin B stained tissue images after pre-processing.

**D. 1**.Comparative distribution of the number of normal (Mean±Std error of mean:12.17± 0.3004) (Std Dev:5.523±0.2124)  and ovarian cancer (Mean±Std error of mean:20.01± 0.3152) (Std Dev:6.282±0.2232) nuclei based on Loop Length values acquired from lamin A stained tissue images before pre-processing.

**D. 2.** Comparative distribution of the number of normal (Mean±Std error of mean:9.869± 0.1275) (Std Dev:3.396±0.09018)and diseased (Mean±Std error of mean:17.5± 0.3255) (Std Dev:7.011±0.2302)nuclei based on Loop Length values acquired from lamin B stained tissue images before pre-processing.

**D. 3**.Comparative distribution of the number of normal (Mean±Std error of mean:8.263± 0.1697) (Std Dev:2.944±0.12)  and ovarian cancer (Mean±Std error of mean:14.54±0.2502) (Std Dev:4.714±0.1769) nuclei based on Loop Length values acquired from lamin A stained tissue images after pre-processing.

**D. 4**.Comparative distribution of the number of normal (Mean±Std error of mean:7.542± 0.1464) (Std Dev:2.549±0.1035)  and ovarian cancer (Mean±Std error of mean:14.82±0.2848) (Std Dev:5.143±0.2014) nuclei based on Loop Length values acquired from lamin B stained tissue images after pre-processing.

**E. 1**.Comparative distribution of the number of normal (Mean±Std error of mean:1.1015± 0.03876) (Std Dev:0.7105±0.02741)  and ovarian cancer (Mean±Std error of mean:0.7776± 0.02854) (Std Dev:0.5651±0.02018) nuclei based on Maximum Curvature values acquired from lamin A stained tissue images before pre-processing.

**E. 2.** Comparative distribution of the number of normal (Mean±Std error of mean:0.797± 0.01755) (Std Dev:0.4672±0.01241)and diseased (Mean±Std error of mean:0.6361± 0.0222) (Std Dev:0.4782±0.01571)nuclei based on Maximum Curvature values acquired from lamin B stained tissue images before pre-processing.

**E. 3**.Comparative distribution of the number of normal (Mean±Std error of mean:0.9067± 0.03614) (Std Dev:0.6228±0.02555)  and ovarian cancer (Mean±Std error of mean:0.5868±0.01745) (Std Dev:0.3288±0.01234) nuclei based on Maximum Curvature values acquired from lamin A stained tissue images after pre-processing.

**E. 4**.Comparative distribution of the number of normal (Mean±Std error of mean:0.8898± 0.02566) (Std Dev:0.4467±0.01815)  and ovarian cancer (Mean±Std error of mean:0.5804±0.0215) (Std Dev:0.3882±0.0152) nuclei based on Maximum Curvature values acquired from lamin B stained tissue images after pre-processing.

**F. 1**.Comparative distribution of the number of normal (Mean±Std error of mean:0.5354± 0.01359) (Std Dev:0.2496±0.009609)  and ovarian cancer (Mean±Std error of mean:0.4402± 0.01048) (Std Dev:0.2086±0.007414nuclei based on Normalized Curvature values acquired from lamin A stained tissue images before pre-processing.

**F. 2.** Comparative distribution of the number of normal (Mean±Std error of mean:0.6323± 0.008435) (Std Dev:0.2246±0.005964)and diseased (Mean±Std error of mean:0.5489± 0.01401) (Std Dev:0.2243±0.007362) nuclei based on Normalized Curvature values acquired from lamin B stained tissue images before pre-processing.

**F. 3**.Comparative distribution of the number of normal (Mean±Std error of mean:0.6464± 0.01286) (Std Dev:0.2224±0.009094)  and ovarian cancer (Mean±Std error of mean:0.605±0.01156) (Std Dev:0.2177±0.008171) nuclei based on Normalized Curvature values acquired from lamin A stained tissue images after pre-processing.

**F. 4**.Comparative distribution of the number of normal (Mean±Std error of mean:0.6803± 0.01289) (Std Dev:0.2244±0.009114)  and ovarian cancer (Mean±Std error of mean:0.6103±0.01261) (Std Dev:0.2277±0.0.008918) nuclei based on Normalized Curvature values acquired from lamin B stained tissue images after pre-processing.
